# Supplementary material
Source: publisher figshare collection journal article supplement (https://gsapubs.figshare.com/articles/dataset/_/21200461)
Supplement: Supplementary file 1 [file 2]

## Sheet: DR1
TABLE S1. AMS DATA AND 10Be CONCENTRATIONS
Sample name	Depth	Quartz mass	10Be/9Be ratio	1σ 10Be/9Be ratio uncertainty	10Be concentration	1σ 10Be concentration uncertainty
	(cm)	(g)	(10-15)	(10-15)	(atoms/g)	(atoms/g)
Bernau-H1B1†	0-18 (9)	26.3354	181.082	6.05449	113900	3800
Bernau-H1B4	54-72 (63)	22.7942	147.936	6.19755	108700	4600
Bernau-H1B6	90-108 (99)	22.7252	106.307	4.00926	77900	3000
Bernau-H1B8	126-144 (135)	25.0006	114.529	4.48933	76500	3000
Bernau-H1B11	180-198 (189)	16.7243	64.9347	3.94023	63900	3900
BlueGentian19-H1B1	0-18 (9)	17.7744	118.458	6.29593	110700	6000
BlueGentian19-H2B4	54-72 (63)	29.0869	145.035	5.77507	83500	3400
BlueGentian19-H1B7	108-126 (117)	17.2418	87.8455	3.65953	85100	3600
BlueGentian19-H1B10	162-180 (171)	23.6562	96.6957	4.50349	68200	3200
BlueGentian19-H1B14	234-252 (243)	23.6595	103.983	5.23759	72700	3700
Harker-H2B1†	0-18 (9)	15.0309	75.2479	3.8425	82387.5	4296.91
Harker-H2B2†	18-36 (27)	15.9629	86.9961	3.92757	90359.1	4166.7
Harker-H1B3	36-54 (45)	15.2694	81.7305	3.04287	89141.6	3404.97
Harker-H1B4	54-72 (63)	20.1994	87.8225	6.16527	71914.1	5128.79
Harker-H1B6	90-108 (99)	26.1422	104.816	4.80633	66603.3	3108.31
Harker-H1B8	126-144 (135)	24.0794	64.245	2.68019	61953.5	2666.05
Harker-H1B10†	162-180 (171)	18.9013	93.0323	3.60327	64229.1	2541.64
Harker-H2B10	162-180 (171)	20.1704	77	2.97	63700	2600
Hayden19-H1B1†	0-18 (9)	15.4976	107.793	5.81042	115800	6300
Hayden19-H1B4	54-72 (63)	28.7083	194.41	6.81141	112000	4000
Hayden19-H1B9	144-162 (153)	25.1287	72.5275	4.01762	47600	2700
Hayden19-H1B14	234-252 (243)	22.8004	65.8048	4.14797	47700	3100
Hayden19-H1B19	324-342 (333)	12.8084	29.6714	2.18813	38400	2900
Hoffman19-H2B1	0-18 (9)	21.2514	125.386	6.41771	97800	5100
Hoffman19-H2B4	54-72 (63)	22.8004	109.297	4.15051	73100	2800
Hoffman19-H2B10	162-180 (171)	29.1535	112.158	4.51873	62000	2500
Hoffman19-H2B16	270-288 (279)	23.9795	69.0999	3.16569	55900	2600
Hoffman19-H2B22	378-396 (387)	24.6151	82.0499	4.80558	55300	3300
Judson-H2B1†	0-18 (9)	28.8827	161.267	6.81522	92900	4000
Judson-H2B4†	54-72 (63)	26.4835	131.202	4.9079	82100	3200
Judson-H2B6	90-108 (99)	18.7798	100.049	5.21152	88900	4700
Judson-H2B8	126-144 (135)	26.8194	135.368	8.60602	81900	5300
Judson-H1B5*	72-90 (81)	23.9893	127	2.37	88400	1800
Judson-H1B6*	90-108 (99)	6.9237	36.8	0.842	88100	2200
Judson-H1B8*†	126-144 (135)	21.6915	122	2.29	94000	1900
Judson-H2B11	180-198 (189)	27.9263	131.662	4.95833	72800	2800
Kalsow19-H1B1†	0-18 (9)	17.2957	105.989	7.80865	101300	7500
Kalsow19-H1B4	54-72 (63)	16.1317	98.2697	3.88731	101600	4100
Kalsow19-H1B7	108-126 (117)	21.8373	116.21	3.9231	88900	3000
Kalsow19-H1B11	180-198 (189)	22.4664	96.9428	3.53243	68700	2500
Kalsow19-H1B15	252-270 (261)	23.58	83.1127	5.85297	58600	4200
Kurtz19-H1B1†	0-18 (9)	19.1343	126.987	5.87613	110400	5200
Kurtz19-H1B4	54-72 (63)	22.5105	146.867	7.94218	110400	6100
Kurtz19-H1B10	162-180 (171)	24.3588	83.0367	3.18793	73400	2900
Kurtz19-H1B16	270-288 (279)	20.3935	76.6995	4.13013	61500	3400
Kurtz19-H1B22	378-396 (387)	22.542	71.6627	3.80893	52200	2800
Sheppard-H1B1†	0-18 (9)	22.4536	454.834	12.1222	336800	9300
Sheppard-H1B4	54-72 (63)	21.8223	412.177	10.5868	313800	8400
Sheppard-H1B6	90-108 (99)	23.7332	323.655	7.36847	225300	5400
Sheppard-H1B9	144-162 (153)	23.8716	197.089	5.51405	136100	4000
Sheppard-H1B14	234-252 (243)	23.0666	144.432	4.81571	104500	3600
Snyder-H1B1†	0-18 (9)	18.9013	114.867	3.4005	101398	3077.61
Snyder-H1B2†	18-36 (27)	21.7661	131.917	4.67024	101111	3644.19
Snyder-H1B3	36-54 (45)	15.4931	92.2252	3.00138	98878	3305.79
Snyder-H1B4	54-72 (63)	17.646	97.071	4.0751	91418.5	3918.93
Snyder-H1B6	90-108 (99)	21.341	101.274	3.65177	79083.9	2914.27
Snyder-H1B10	162-180 (171)	22.8701	98.9376	3.27408	70868	2402.68
Snyder-H1B12	198-216 (207)	22.009	86.9486	3.17466	65577.7	2452.69
SpringCreek-H2B1	0-18 (9)	13.7905	537	9.9	627800	11900
SpringCreek-H2B4	54-72 (63)	28.1528	537.146	9.89653	316300	6000
SpringCreek-H2B6	90-108 (99)	25.3033	366.82	11.5004	243200	7700
SpringCreek-H2B8	126-144 (135)	29.3	332.236	7.53224	189500	4400
SpringCreek-H2B11	180-198 (189)	28.8404	255.289	8.3766	148200	4900
Steinauer19-H1B1†	0-18 (9)	19.6599	144.194	5.04019	121800	4300
Steinauer19-H1B4	54-72 (63)	6.872	44.538	2.82124	106700	7000
Steinauer19-H1B9	144-162 (153)	28.5026	141.48	5.59506	81500	3300
Steinauer19-H1B15	252-270 (261)	29.3417	129.875	5.26222	73200	3000
Steinauer19-H1B21	360-378 (369)	13.9614	64.6646	3.57979	77000	4300
Stinson19-H3B1†	0-18 (9)	21.8182	112.98	4.78914	86200	3700
Stinson19-H3B4	54-72 (63)	18.203	88.728	4.21526	80400	3900
Stinson19-H3B10	162-180 (171)	14.6544	45.4408	3.34221	50300	3800
Stinson19-H3B16	270-288 (279)	18.7698	61.4277	3.31303	53600	3000
Stinson19-H3B22	378-396 (387)	27.9882	90.026	4.2698	53100	2600
Willis19-H1B1	0-18 (9)	17.3272	102.846	4.72436	98900	4600
Willis19-H1B16	270-288 (279)	28.9054	102.432	4.21297	58100	2500
Willis19-H1B22	378-396 (387)	30.2584	102.302	5.49508	55900	3100
Note: Depth measurements indicate the top and bottom of the sample, with the mean sample depth listed in parentheses. Samples were measured at the Purdue Rare Isotope Measurement (PRIME) Laboratory except where noted otherwise. Blanks measured with the PRIME samples had the following 10Be/9Be ratios: 7.6E-16, 8.4E-16, 4.1E-16, 8.7E-16, 7.6E-16, 1.3E-15, 6.1E-16, 4.5E-16, 9.3E-16, 6.6E-16, 3.4E-16…
*Samples measured at Lawrence Livermore National Laboratory (LLNL). Blank measured with the LLNL samples had a 10Be/9Be ratio of 3.7E-16.
†Samples omitted from depth profile analysis.

## Sheet: DR2
TABLE S2. DEPTH PROFILE ANALYSIS INPUT VALUES
	Site information*			10Be †		Monte Carlo simulator††
Site name	Latitude	Longitude	Elevation	Spallogenic production rate§	Muonic production rate#	Minimum age§§	Maximum age	Minimum denudation rate	Maximum denudation rate###	Minimum denudation threshold	Maximum denudation threshold###	Minimum inheritance	Maximum inheritance****
	(°)	(°)	(m)	(atoms/g/yr)	(atoms/g/yr)	(ka)	(ka)	(cm/ka)	(cm/ka)	(cm)	(cm)	(atoms/g)	(atoms/g)
Bernau	43.003	-94.323	352.27	5.3396	0.207	14.2	17.4	0	100	0	1000	0	67800
BlueGentian	43.7189	-95.1021	453.626	5.8769	0.213	18	21.1	0	100	0	1000	0	76400
Harker	41.9056	-93.4932	294.7	5.01817	0.203	16.1	19.3	0	100	0	1000	0	66770.8
Hayden**	43.4364	-92.377	401.296	5.59907	0.21	42.0##	677.0*** (2700.0##)	0	25	0	10000 (20000)	0	41300
Hoffman	43.1356	-93.4534	386.939	5.51183	0.209	16.1	19.3	0	100	0	1000	0	58600
Judson	41.8255	-94.6023	373.006	5.37009	0.208	16.1	19.3	0	100	0	1000	0	75600
Kalsow	42.5665	-94.5614	378.267	5.43744	0.208	15.5	18.7	0	100	0	1000	0	62800
Kurtz	42.0826	-93.2241	340.273	5.23318	0.206	16.1	19.3	0	100	0	1000	0	55000
Sheppard	39.1645	-95.2706	350.308	5.10151	0.207	12.0§§§	928.0***	0	10	0	3000	0	108100
Snyder	41.7765	-93.4926	292.149	5.00027	0.203	16.1	19.3	0	100	0	1000	0	68030.4
SpringCreek	40.6792	-96.8467	439	5.61261	0.213	12.0§§§	677.0***	0	10	0	2000	0	153100
Steinauer	43.0904	-98.177	469.695	5.91785	0.215	12.8	21.7	0	100	0	1000	0	81300
Stinson	43.0458	-94.3274	369.718	5.42436	0.208	13.5	16.8	0	100	0	1000	0	55700
Willis	42.9596	-93.4498	382.802	5.48174	0.209	16.1	19.3	0	100	0	1000	0	59000
*Coordinates are from field GPS data, with reference to NAD83 datum. All sites have a shielding value and cover value of 1.
†We use a 10Be half life of 1.387 Ma with 5% error and a neutron attenuation length of 160 g/cm2 with a std of 5 g/cm2 (Hidy et al., 2010).
§Site production rates are calculated using a reference production rate of 4.01 atoms/g/yr (Borchers et al., 2015) and the scaling scheme of Stone (2000) after Lal (1991). The production rate is treated as a constant value with no uncertainty (e.g., Hidy et al., 2010).
#Muon production rates are calculated using a depth of muon fit of 20 m and 0% error in total production rate (e.g., Hidy et al., 2010).
**We include two alternate simulations for Hayden due to low-confidence maximum exposure age and exposure age results.
††The Monto Carlo simulator generates 100,000 profiles within a 2 sigma confidence level.
§§Exposure age constraints are from Dalton et al. (2020) unless noted otherwise.
##Maximum timing if regional glaciation, as summarized by Kerr et al. (2021).
***From Batchelor et al. (2019).
§§§From Balco et al. (2005).
###Maximum denudation rate and threshold are based on the range of solutions for each site, and are set to be high enough that they do not restrict possible solutions.
****Calculated from 10Be concentration of the deepest sample from each site.

## Sheet: DR3
TABLE S3. 10Be DEPTH PROFILE ANALYSIS RESULTS
			Bernau	Blue Gentian	Harker	Hayden	Hoffman	Judson	Kalsow	Kurtz	Sheppard	Snyder	Spring Creek	Steinauer	Stinson	Willis
Denudation rate*	(mm/yr)	Mode	0.0012	0.1806	0.0983	0.059 (0.059)†	0.1617	0.1214	0.0062	0.0002	0.014	0.0629	0.0147	0.087	0.0973	0.0575
		Maximum (2σ)	0.1176	0.3509	0.2969	0.137 (0.149)	0.3356	0.3286	0.0886496	0.0488	0.0319	0.180934	0.0221	0.31635	0.257388	0.1813
		Minimum (2σ)	0	0.0882	0.0153	0.026 (0.030)	0.0773	0.0014	4.39e-05	0.0001	0	0.0052791	0.002	0.00017	0.0275399	0.0031
		Bayesian most probable	0	0.1848	0.0978	0.057 (0.060)	0.163	0.0978	0.0108696	0	0.0141	0.0652174	0.0141	0.08696	0.0952381	0.0543
		Bayesian maximum (2σ)	0.0694	0.4349	0.3139	0.087 (0.084)	0.305	0.2855	0.0523154	0.0263	0.0193	0.147223	0.0177	0.33185	0.206693	0.1162
		Bayesian minimum (2σ)	0	0.1087	0.0333	0.040 (0.045)	0.0988	0.0227	0	0	0.0048	0.0185376	0.009	0.01579	0.0229962	0.0163
Erosion rate§	(mm/yr)	Mode	0.00105379	0.108782	0.0673155	0.043 (0.044)	0.107265	0.109808	0.00385663	0.000146989	0.00823624	0.046231	0.00799224	0.0443437	0.0485042	0.0417129
		Maximum (2σ)	0.103271	0.211359	0.203316	0.101 (0.111)	0.222623	0.297222	0.0551433	0.0358654	0.0187669	0.132985	0.0120156	0.161243	0.128308	0.131522
		Minimum (2σ)	0	0.0531259	0.0104774	0.019 (0.022)	0.0512775	0.00126632	2.73074e-05	7.34947e-05	0	0.0038801	0.00108738	8.66485e-05	0.0137287	0.00224887
		Bayesian most probable	0	0.111311	0.0669732	0.042 (0.044)	0.108127	0.0884612	0.00676129	0	0.00829507	0.0479343	0.00766603	0.0443233	0.0474763	0.0393914
		Bayesian maximum (2σ)	0.0609441	0.261955	0.214958	0.064 (0.063)	0.202324	0.258238	0.0325421	0.0193291	0.0113542	0.108208	0.00962332	0.169143	0.103037	0.0842962
		Bayesian minimum (2σ)	0	0.0654738	0.0228037	0.030 (0.033)	0.0655397	0.0205324	0	0	0.00282385	0.013625	0.00489321	0.00804812	0.0114636	0.0118247
Exposure age#	(ka)	Mode	17.3	21	18.2	675.5 (2407.9)	16.7	17.3	18.6	19.2	516.9	16.4	629.4	13.2	16.3	16.4
		Maximum (2σ)	17.4	21.1	19.3	677 (2699.9)	19.3	19.3	18.7	19.3	928	19.3	677	21.7	16.8	19.3
		Minimum (2σ)	14.2	18	16.1	42.0 (42.0)	16.1	16.1	15.5	16.1	68.7	16.1	118.2	12.8	13.5	16.1
		Bayesian most probable	17.4	18	16.3	670.1 (2035.5)	16.2	16.1	18.6	19.3	868.3	16.1	655.3	12.8	13.7	16.1
		Bayesian maximum (2σ)	17.4	21	19.2	666.9 (2650.5)	19.2	19.2	18.6	19.3	908.9	19.2	666	21.5	16.7	19.2
		Bayesian minimum (2σ)	14.3	18	16.1	64.9 (197.0)	16.1	16.1	15.6	16.3	99.1	16.1	165.2	12.9	0	16.1
Inheritance	(10^4 atoms/g)	Mode	5.27	6.64	5.29	1.99 (2.00)	5.46	6.99	5.62	5.33	4.97	6.03	7.53	7.16	4.97	5.41
		Maximum (2σ)	6.48	7.16	6.17	3.98 (4.13)	5.86	7.56	6.259	5.5	9.69	6.727	12.66	7.66	5.263	5.87
		Minimum (2σ)	4.24	5.65	3.78	0.00 (0.00)	4.74	4.62	4.475	4.65	0	4.786	0	6.43	4.639	4.74
		Bayesian most probable	5.31	6.81	5.3	1.98 (1.98)	5.41	6.98	5.597	5.32	4.93	5.99	6.99	7.16	4.907	5.39
		Bayesian maximum (2σ)	6.16	7.44	6.17	3.04 (3.98)	5.81	7.52	6.143	5.49	7.14	6.607	9.95	7.65	5.304	5.76
		Bayesian minimum (2σ)	4.62	5.91	4.26	0.47 (0.17)	4.84	5.56	4.983	4.88	0.48	5.172	2.44	6.5	4.465	4.91
Note: We used the MATLAB version 1.2 of the 10Be depth profile simulator from Hidy et al. (2010).
*The denudation rate mode, rather than the Bayesian most probable value, is reported in the main text and figures because the Bayesian most probable denudation rate is zero for Kurtz and Bernau, which is incompatible with the Zr data, which demonstrate chemical denudation at those sites.
†Values reported for Hayden represent results using a maximum exposure age of 677 ka, which are shown in the main text figures, and a maximum age of 2.7 Ma, shown here in parentheses.
§Calculated from the denudation rate and Zr-derived chemical depletion fraction for each site. The 1σ erosion rate uncertainty in Figure 4b was calculated by halving the 2σ uncertainty from the erosion rate results.
#Bayesian most probable exposure age results are shown in Figure 3.

## Sheet: DR4
TABLE S4. CHEMICAL DEPLETION FRACTION (CDF) MEASUREMENTS
Site name	"Parent" sample(s)	"Soil" sample(s)	[Zr]parent	[Zr]soil	[Zr]parent average*	[Zr]soil average*	Chemical depletion fraction (CDF)
			ppm	ppm	ppm	ppm
Bernau	Bernau-H1B11	Bernau-H1B1	192.272	216.137	189.311	215.578	0.121843
	Bernau-H2B11	Bernau-H2B1	186.35	215.018
Blue Gentian	BlueGentian19-H1B14	BlueGentian19-H1B1	117.319	274.235	152.849	253.761	0.397666
	BlueGentian19-H1B13		136.979
	BlueGentian19-quarry	BlueGentian19-H2B1	204.25	233.288
Harker	Harker-H1B10	Harker-H1B1	180.598	263.724	-	-	0.315203
Hayden	Hayden19-H1B19	Hayden19-H1B1	243.309	328.065	-	-	0.258352
Hoffman	Hoffman19-H2B22	Hoffman19-H2B1	174.777	263.473	-	-	0.336643
Judson	Judson-H1B11	Judson-H1B1	265.46	293.484	-	-	0.0954889
Kalsow	Kalsow19-H1B15	Kalsow19-H1B1	164.61	264.63	-	-	0.377963
Kurtz	Kurtz19-H1B22	Kurtz19-H1B1	199.513	278.741	-	-	0.265053
Sheppard	Sheppard-H1B14	Sheppard-H1B1	315.798	505.367	-	-	0.411697
Snyder	Snyder-H1B13	Snyder-H1B1	221.373	301.191	-	-	0.265008
Spring Creek	SpringCreek-H2B10	SpringCreek-H1B1	273.428	502.912	-	-	0.45631
Steinauer	Steinauer19-H1B21	Steinauer19-H1B1	165.392	338.838	169.862	333.261	0.490303
	Steinauer19-H1B20	Steinauer19-H1B2	174.332	327.684
Stinson	Stinson19-H3B22	Stinson19-H3B1	114.412	236.64	118.067	236.844	0.501499
	Stinson19-H3B21	Stinson19-H4B1	121.722	237.048
Willis	Willis19-H1B22	Willis19-H1B1	177.674	244.918	177.674	244.918	0.274559
	Willis19-H1B22a	Willis19-H1B1a	189.1	242.055
Note: Zr concentrations have been corrected for loss on ignition.
*Average values are reported when Zr concentrations were measured in either adjacent replicate samples (from two different depth profiles located ~1 m apart) or separate splits of the same sample.

## Sheet: DR5
TABLE S5. BULK DENSITY MEASUREMENTS
Sample name	Depth*	Moist mass	Dry mass	Water content	Moist density	Dry density
	(cm)	(g)	(g)	(wt%)	(g/cm)	(g/cm)
Prairie samples
Harker-100cm	100	N.D.	150.77	N.D.	N.D.	1.66083
Hayden19-H1	0	N.D.	75.76	N.D.	N.D.	0.834545
Hoffman19-H1/H2	0	N.D.	88.23	N.D.	N.D.	0.97191
Judson-H2-200cm-adjusted	200	N.D.	165.47	N.D.	N.D.	1.82276
Judson-H2-62cm	62	N.D.	136.96	N.D.	N.D.	1.5087
Judson-H2B1	0	N.D.	102.02	N.D.	N.D.	1.12382
Kalsow19-H1	0	N.D.	65.48	N.D.	N.D.	0.721304
Kalsow19-H2	0	N.D.	98.63	N.D.	N.D.	1.08647
Kurtz19-H1/H2	0	N.D.	80.66	N.D.	N.D.	0.888522
Kurtz17-H1B1	0	N.D.	89.93	N.D.	N.D.	0.990637
Kurtz17-H1B6	90	N.D.	160.91	N.D.	N.D.	1.77253
Sheppard-prairie-bulk-density1	0	140.34	109.79	21.7686	1.54594	1.20941
Sheppard-prairie-bulk-density2	0	137.18	N.D.	N.D.	1.51113	N.D.
Sheppard-prairie-bulk-density3	0	128.88	N.D.	N.D.	1.4197	N.D.
Sheppard-prairie-bulk-density6a	0	N.D.	98.83	N.D.	N.D.	1.08868
Sheppard-prairie-bulk-density6b	0	N.D.	107.16	N.D.	N.D.	1.18044
Snyder-H2-100cm	100	N.D.	145.36	N.D.	N.D.	1.60123
Snyder-H2-42cm	42	N.D.	138.95	N.D.	N.D.	1.53062
Snyder-H2B1	0	N.D.	111.74	N.D.	N.D.	1.23089
SpringCreek-H2B1	0	N.D.	87.28	N.D.	N.D.	0.961445
SpringCreek-H2B3	36	139.38	115.58	17.0756	1.53536	1.27319
SpringCreek-H2B6	90	100.57	87.98	12.5186	1.10784	0.969156
Steinauer19-H1	0	N.D.	89.81	N.D.	N.D.	0.989315
Stinson19-H3B1	0	94.5	78.43	17.0053	1.04098	0.863957
Willis19-H1/H2	0	N.D.	90.41	N.D.	N.D.	0.995924
Quarry samples
BlueGentian19-quarry	500	172.42	155.9	9.58126	1.89932	1.71734
Fort Dodge Quarry 1019	400	N.D.	161.3	N.D.	N.D.	1.77682
Goodell Quarry 1019	300	N.D.	147.1	N.D.	N.D.	1.6204
Kossuth County Quarry 1019	450	N.D.	161.6	N.D.	N.D.	1.78013
Lanesboro Quarry 1019	450	N.D.	176.8	N.D.	N.D.	1.94757
Marathon Quarry 1019	350	N.D.	192.7	N.D.	N.D.	2.12271
Redfield Quarry 1019	450	N.D.	178.7	N.D.	N.D.	1.9685
Unique Quarry 1019	375	N.D.	195.7	N.D.	N.D.	2.15576
Willow Creek Quarry 1019	250	N.D.	186.5	N.D.	N.D.	2.05442
Wolstock Quarry 1019	250	N.D.	163.9	N.D.	N.D.	1.80546
Note: Samples were measured in the Hartshorn Quaternary Laboratory at UMass Amherst. "Moist" measurements reflect samples that appeared saturated; samples lacking moist values appeared dry upon weighing. "Dried" values reflect measurements after oven-drying. N.D. = no data. *Bulk density samples are 5.08 cm in length. The listed depth value refers to the depth of the top of the sample. "Prairie s…

## Sheet: DR6
TABLE S6. MAJOR OXIDE CONCENTRATIONS
Sample name	SiO2	TiO2	Al2O3	Fe2O3	MnO	MgO	CaO	Na2O	K2O	P2O5	Total	Loss on ignition
	(%)	(%)	(%)	(%)	(%)	(%)	(%)	(%)	(%)	(%)	(%)	(%)
Bernau-H1B1	80.1485	0.4235	10.309	3.081	0.132	0.7735	1.3605	1.357	1.779	0.139	99.503	12.7868
Bernau-H2B1	80.188	0.409	10.2555	3.0085	0.11	0.7435	1.2835	1.336	1.7765	0.1215	99.232	12.1004
Bernau-H1B11	70.5085	0.4045	9.0765	3.115	0.11	3.942	9.259	1.2905	1.7595	0.1245	99.59	11.5836
Bernau-H2B11	70.4965	0.4325	9.7105	3.334	0.116	3.6285	8.814	1.244	1.856	0.124	99.756	11.457
BlueGentian19-H1B1	78.3995	0.547	11.279	3.6065	0.094	0.793	1.1315	1.346	2.1325	0.17	99.499	10.6606
BlueGentian19-H2B1	76.8535	0.48	11.1545	3.7705	0.0855	1.105	2.448	1.403	2.017	0.143	99.46	10.8397
BlueGentian19-H1B13	74.3085	0.241	8.4925	2.5385	0.0815	2.6175	7.707	1.6755	1.5975	0.1	99.3595	8.74497
BlueGentian19-H1B14	77.241	0.2395	8.321	2.6065	0.09	2.116	5.462	1.686	1.603	0.0975	99.4625	7.09057
BlueGentian19-Quarry	70.239	0.4475	9.934	3.425	0.0695	3.162	9.217	1.3145	1.877	0.1335	99.819	11.3833
Harker-H1B1	79.56	0.4305	10.39	3.067	0.078	0.7285	1.441	1.5285	1.8495	0.1215	99.1945	9.375
Harker-H1B10	72.425	0.352	9.254	2.668	0.074	2.9755	8.3745	1.5585	1.767	0.0975	99.546	9.74405
Hayden19-H1B1	78.814	0.626	10.981	3.6025	0.1165	0.709	1.124	0.968	1.76	0.2105	98.9115	16.4799
Hayden19-H1B19	69.2385	0.5455	11.192	4.1235	0.044	1.7755	6.492	0.8265	1.7655	0.133	96.136	9.16885
Hoffman19-H2B1	81.647	0.357	9.3635	2.5365	0.07	0.5375	1.2635	1.828	1.7995	0.058	99.4605	4.35467
Hoffman19-H2B22	73.016	0.311	8.766	2.433	0.0595	3.304	8.4745	1.679	1.754	0.1	99.897	10.1712
Judson-H1B1	78.109	0.4505	10.258	3.1805	0.0925	1.028	2.2325	1.486	1.9505	0.136	98.9235	9.36479
Judson-H2B1	77.6215	0.4725	10.69	3.4545	0.0995	1.078	2.2225	1.536	1.989	0.1425	99.306	9.08764
Judson-H1B11	72.4075	0.485	10.222	3.4665	0.093	2.84	6.6555	1.296	1.9375	0.125	99.528	9.5908
Judson-H2B11	71.876	0.5285	10.688	3.6535	0.0815	2.9055	6.302	1.2695	2.0065	0.1335	99.4445	9.47286
Kalsow19-H1B1	76.5475	0.547	11.5405	3.8355	0.0845	1.1275	2.072	1.271	2.034	0.2025	99.262	15.7314
Kalsow19-H1B15	74.106	0.287	8.9185	2.6465	0.103	2.7755	7.343	1.4865	1.6765	0.108	99.4505	9.48282
Kurtz19-H1B1	81.064	0.443	9.89	2.7765	0.124	0.583	0.945	1.334	1.8955	0.123	99.178	11.746
Kurtz19-H1B2	80.944	0.442	10.5175	2.984	0.0745	0.608	0.8865	1.3895	1.9	0.091	99.837	6.34439
Kurtz19-H1B3	80.0415	0.4475	11.127	3.253	0.071	0.691	0.8905	1.3925	1.911	0.0735	99.8985	5.65789
Kurtz19-H1B4	80.0655	0.39	10.7975	3.1245	0.089	0.6815	0.9595	1.574	1.884	0.06	99.6255	4.71537
Kurtz19-H1B5	81.1655	0.3435	10.091	2.749	0.0785	0.6215	0.9955	1.635	1.831	0.053	99.5635	3.44604
Kurtz19-H1B6	81.209	0.3345	10.134	2.6765	0.079	0.609	1.076	1.762	1.8775	0.058	99.8155	3.01606
Kurtz19-H1B7	80.6925	0.374	10.0565	2.823	0.0875	0.6585	1.142	1.76	1.899	0.075	99.568	2.83764
Kurtz19-H1B8	79.32	0.466	10.638	3.2245	0.093	0.8035	1.208	1.7135	1.993	0.103	99.5625	3.32224
Kurtz19-H1B9	80.9135	0.383	9.741	2.8025	0.0835	0.6655	1.2315	1.7365	1.895	0.0965	99.5485	2.94591
Kurtz19-H1B10	80.62	0.354	9.73	2.722	0.078	0.881	1.574	1.743	1.8615	0.0905	99.654	3.49078
Kurtz19-H1B11	76.378	0.314	9.362	2.6375	0.1025	2.2755	5.296	1.594	1.7625	0.0915	99.8135	7.10623
Kurtz19-H1B12	71.4085	0.415	10.003	3.07	0.0905	3.169	8.032	1.483	1.8885	0.114	99.6735	9.74869
Kurtz19-H1B13	73.599	0.363	9.471	2.737	0.074	2.8225	7.2345	1.531	1.7815	0.1015	99.715	8.83879
Kurtz19-H1B14	72.9325	0.3715	9.4645	2.8025	0.078	3.124	7.8985	1.5465	1.786	0.1085	100.113	9.61948
Kurtz19-H1B15	73.268	0.3645	9.402	2.755	0.0735	2.982	7.685	1.534	1.7985	0.108	99.9705	9.21387
Kurtz19-H1B16	73.9065	0.376	9.589	2.6225	0.066	3.05	7.5025	1.5175	1.848	0.108	100.586	9.49476
Kurtz19-H1B17	73.047	0.3635	9.3765	2.695	0.069	3.0945	7.8205	1.5245	1.802	0.1085	99.901	9.37418
Kurtz19-H1B18	72.825	0.3785	9.465	2.7985	0.085	3.142	7.7525	1.514	1.821	0.1145	99.896	9.3607
Kurtz19-H1B19	73.0515	0.389	9.5915	2.835	0.062	3.0715	7.4035	1.513	1.86	0.1155	99.8925	9.15368
Kurtz19-H1B20	73.0095	0.364	9.34	2.77	0.076	3.1135	7.8095	1.5225	1.827	0.109	99.941	9.81028
Kurtz19-H1B21	72.518	0.3575	9.358	2.77	0.071	3.34	8.1505	1.52	1.796	0.108	99.989	9.88576
Kurtz19-H1B22	72.1295	0.3515	9.196	2.774	0.0725	2.974	7.4715	1.558	1.804	0.1075	98.4385	10.7829
Sheppard-H1B1	83.4105	0.6765	8.733	2.946	0.07	0.3965	0.6315	0.738	1.5145	0.0715	99.188	7.39403
Sheppard-H1B2	82.495	0.6965	9.4345	3.2685	0.0845	0.428	0.5435	0.7035	1.513	0.062	99.229	6.60413
Sheppard-H1B3	80.663	0.698	10.6785	3.9625	0.1145	0.5085	0.536	0.645	1.466	0.048	99.32	6.71104
Sheppard-H1B4	77.047	0.6915	13.717	4.908	0.0765	0.706	0.659	0.5345	1.396	0.037	99.7725	7.77461
Sheppard-H1B5	72.567	0.6345	15.956	6.4955	0.051	0.9095	0.8385	0.465	1.4075	0.0315	99.356	9.04738
Sheppard-H1B6	72.484	0.6125	15.2885	6.84	0.0355	0.9395	0.891	0.5795	1.462	0.0295	99.162	9.30763
Sheppard-H1B7	76.6045	0.6045	13.0135	5.0695	0.03	0.811	0.8555	0.745	1.513	0.0265	99.273	5.38655
Sheppard-H1B8	74.6095	0.596	13.3885	6.053	0.164	0.8185	1.2145	0.827	1.597	0.042	99.31	7.58884
Sheppard-H1B9	75.1935	0.601	12.657	6.0605	0.2335	0.8315	1.0815	0.8545	1.729	0.095	99.337	7.63832
Sheppard-H1B10	74.607	0.614	13.0965	5.8965	0.1395	0.8775	1.4325	0.8255	1.763	0.1225	99.3745	6.18714
Sheppard-H1B11	73.565	0.613	11.67	5.1245	0.094	0.792	4.971	0.876	1.829	0.1375	99.672	7.71696
Sheppard-H1B12	73.738	0.6155	11.126	4.811	0.0885	0.751	5.5285	0.906	1.856	0.142	99.5625	7.50614
Sheppard-H1B13	73.389	0.598	10.8665	3.5075	0.064	0.6855	7.662	0.855	1.8095	0.1385	99.5755	8.57195
Sheppard-H1B14	74.2075	0.594	11.093	3.8645	0.0865	0.7355	5.916	0.8995	1.827	0.1315	99.355	9.27753
Snyder-H1B1	81.5795	0.4945	9.3835	2.5025	0.107	0.551	1.228	1.3815	1.984	0.127	99.3385	8.03185
Snyder-H1B13	73.059	0.41	9.654	3.1235	0.066	2.732	7.1375	1.403	1.822	0.1045	99.5115	9.20313
SpringCreek-H1B1	78.8305	0.649	11.3835	3.1765	0.0855	0.759	0.94	1.1495	2.232	0.1045	99.31	16.4864
SpringCreek-H2B10	72.0355	0.4985	11.718	3.659	0.11	1.1555	6.72	1.156	2.0825	0.1495	99.2845	15.5171
Steinauer19-H1B1	74.4835	0.6075	13.023	4.3915	0.136	1.2955	1.1475	1.213	2.5575	0.179	99.034	10.2816
Steinauer19-H1B2	73.08	0.647	14.0405	4.952	0.13	1.616	1.0455	1.1415	2.583	0.15	99.3855	8.4484
Steinauer19-H1B20	65.8485	0.38	10.0315	3.9385	0.502	2.704	11.2235	1.272	1.969	0.168	98.037	12.8102
Steinauer19-H1B21	64.637	0.3865	10.102	3.788	0.276	2.6795	11.2	1.291	1.974	0.1675	96.5015	12.3296
Stinson19-H3B1	77.3135	0.4735	11.375	3.836	0.1075	0.872	1.5405	1.508	1.9815	0.125	99.1325	12.1028
Stinson19-H4B1	74.406	0.239	9.286	2.595	0.0915	2.424	6.9025	1.7095	1.771	0.0975	99.522	11.4105
Stinson19-H3B21	77.839	0.4665	11.2255	3.6565	0.0955	0.8815	1.6825	1.5385	1.9765	0.1325	99.4945	8.80848
Stinson19-H3B22	75.386	0.229	8.716	2.247	0.097	2.442	7.34	1.7375	1.7125	0.0935	100	8.2267
Willis19-H1B1	70.9475	0.4715	10.258	3.2	0.1015	2.935	7.428	1.4015	1.9765	0.171	98.8905	15.0736
Willis19-H1B22	72.765	0.3525	9.056	2.567	0.0595	3.303	8.1565	1.5645	1.792	0.105	99.721	9.9472
Willis19-H1B1a	69.8335	0.46	10.4325	3.36	0.098	3.3055	8.35	1.516	1.9975	0.1655	99.5185	15.7217
Willis19-H1B2a	67.2305	0.4995	10.3805	3.5835	0.106	3.8375	11.2145	1.3565	1.938	0.145	100.291	13.8796
Willis19-H1B3a	60.897	0.485	9.893	3.3105	0.103	4.305	12.018	1.191	1.822	0.134	94.1585	15.2327
Willis19-H1B4a	65.349	0.52	10.493	3.5465	0.1135	4.727	12.089	1.314	1.966	0.1435	100.261	14.9381
Willis19-H1B10a	67.48	0.4915	10.3275	3.4875	0.0945	4.3575	10.1225	1.3685	1.9935	0.1455	99.8685	12.3688
Willis19-H1B16a	70.5565	0.403	10.1555	3.335	0.0845	3.357	8.0615	1.4775	1.939	0.126	99.4955	10.3282
Willis19-H1B22a	71.466	0.354	9.206	2.7175	0.069	3.6145	8.5655	1.5675	1.8165	0.115	99.4915	10.6293
Standards
G-2 A	69.077	0.459	15.411	2.651	0.03	0.703	1.933	4.006	4.532	0.133	98.935	N/A
G-2 B	68.969	0.462	15.384	2.643	0.032	0.716	1.938	3.998	4.52	0.133	98.795	N/A
G-2 C	68.989	0.46	15.398	2.672	0.032	0.72	1.948	4.054	4.517	0.133	98.923	N/A
G-2 A	68.952	0.454	15.413	2.647	0.031	0.715	1.937	4.03	4.53	0.131	98.84	N/A
G-2 B	68.874	0.458	15.399	2.645	0.031	0.717	1.945	4.039	4.507	0.132	98.747	N/A
G-2 C	68.91	0.461	15.398	2.668	0.033	0.72	1.941	4.046	4.525	0.134	98.836	N/A
G-2 A	68.964	0.457	15.395	2.635	0.033	0.717	1.936	4.046	4.519	0.13	98.832	N/A
G-2 B	68.845	0.459	15.369	2.638	0.031	0.711	1.941	4.028	4.506	0.133	98.661	N/A
G-2 C	68.973	0.461	15.393	2.664	0.031	0.725	1.94	4.011	4.519	0.133	98.85	N/A
G-2 A	68.943	0.456	15.382	2.64	0.031	0.71	1.957	4.059	4.529	0.133	98.84	N/A
G-2 B	68.868	0.459	15.366	2.64	0.031	0.718	1.943	4.026	4.516	0.132	98.699	N/A
G-2 C	68.949	0.461	15.388	2.668	0.032	0.727	1.943	4.036	4.52	0.13	98.854	N/A
G-2 A	69.091	0.461	15.423	2.643	0.033	0.714	1.957	4.045	4.507	0.132	99.006	N/A
G-2 B	68.97	0.457	15.396	2.641	0.033	0.71	1.958	4.061	4.52	0.131	98.877	N/A
G-2 C	69.004	0.459	15.416	2.667	0.032	0.723	1.955	4.011	4.515	0.132	98.914	N/A
QLO-1 A	65.752	0.587	16.369	4.465	0.105	0.994	3.24	4.227	3.697	0.262	99.698	N/A
QLO-1 B	65.998	0.595	16.433	4.338	0.09	0.989	3.239	4.252	3.724	0.263	99.921	N/A
QLO-1 A	65.844	0.587	16.396	4.47	0.107	0.989	3.239	4.284	3.693	0.26	99.869	N/A
QLO-1 B	66.082	0.593	16.45	4.358	0.089	0.99	3.242	4.282	3.708	0.262	100.056	N/A
RGM-1 A	73.138	0.248	13.858	1.835	0.033	0.259	1.204	4.118	4.439	0.044	99.176	N/A
RGM-1 B	73.012	0.249	13.829	1.839	0.036	0.24	1.193	4.081	4.425	0.042	98.946	N/A
RGM-1 A	73.267	0.243	13.888	1.847	0.036	0.252	1.206	4.154	4.417	0.044	99.354	N/A
RGM-1 B	73.105	0.249	13.846	1.849	0.035	0.254	1.204	4.153	4.408	0.042	99.145	N/A
Note: We measured two aliquots of each sample. The reported concentrations are the sample average and have not been adjusted for LOI.

## Sheet: DR7
TABLE S7. TRACE ELEMENT CONCENTRATIONS
Sample name	Nb	Zr	Y	Sr	U	Rb	Th	Pb	Ga	Zn	Ni	Cr	V
	ppm	ppm	ppm	ppm	ppm	ppm	ppm	ppm	ppm	ppm	ppm	ppm	ppm
Bernau-H1B1	8.5	188.5	13.6	146	1	65.5	6	18	10	61	20.5	221	86
Bernau-H2B1	7.8	170	15.2	171	1	49	5	12	9	61	22	44	87
Bernau-H1B11	8.7	189	16.6	145	1.2	64.8	5.7	16.2	10.1	61	19	101	90
Bernau-H2B11	8.6	165	16.9	169	0.9	54.8	5.4	11.6	9.9	71	23	55	97
BlueGentian19-H1B1	11.4	245	20.5	144	1	76	7	18	11	68	23	58	86
BlueGentian19-H2B1	10.5	208	18.9	153	0.7	63.7	6.6	17	11.2	61	27	197	101
BlueGentian19-H1B13	5.7	125	11.6	182	0.3	47.8	3.6	10.4	8.6	51	20	68	80
BlueGentian19-H1B14	5.1	109	10.7	191	0	45	4	11	8	41	18	53	61
BlueGentian19-Quarry	10	181	16.9	190	1.3	57	5.4	12.2	10	59	24	427	98
Harker-H1B1	8.5	239	16.7	161	0.4	58	6	24	10	53	20	80	75
Harker-H1B10	6.8	163	13	193	0.3	49	5	11	9	42	19	72	65
Hayden19-H1B1	12.1	274	19.7	105	3	85	7	20	11	69	19	54	73
Hayden19-H1B19	11.8	221	20.2	142	7	69	7	13	13	65	32	78	91
Hoffman19-H2B1	7	252	13.3	198	1	51	5	21	10	50	17	52	64
Hoffman19-H2B22	6	157	12.1	195	1	47	4	14	9	40	15	43	59
Judson-H1B1	9.4	266	18.2	165	0.6	61.4	6.2	17	10.4	55	25	363	88
Judson-H2B1	9.45	262	18.55	168.5	1	61.5	6	17.5	11	56	27	480.5	89.5
Judson-H1B11	9.9	240	19	174	1.3	62.4	6.6	12.8	10.6	59	27	305	88
Judson-H2B11	10.7	258	20.4	172	1	65	7	14	11	60	24	56	84
Kalsow19-H1B1	10.8	223	20.4	137	3	75	7	19	11	79	22	85	88
Kalsow19-H1B15	5.9	149	12.4	192	0.5	49	5	12	9	53	19	40	90
Kurtz19-H1B1	9.2	246	16	142	1	67	6	17	10	53	18	72	84
Kurtz19-H1B2	9.1	236	16.5	150	1.1	65.5	6.5	14.8	10.7	46	18	65	75
Kurtz19-H1B3	9.1	232	18	153	0.7	63.4	6.7	15.7	11.4	48	23	422	86
Kurtz19-H1B4	8.3	213	16.4	169	0.8	58.8	6.1	15	11.1	45	25	492	87
Kurtz19-H1B5	7.4	204	15.5	184	0.8	54	5.5	14.2	10.6	41	20	53	81
Kurtz19-H1B6	7.3	200	15.2	197	0.7	54	5.8	13.7	10.6	39	18	58	74
Kurtz19-H1B7	7.9	221	17.1	200	0.8	53.4	6.1	13.6	10.5	44	20	69	76
Kurtz19-H1B8	9.7	266	20.7	194	1	56.4	6.7	15	11.1	54	37	482	90
Kurtz19-H1B9	8.3	241	16.7	199	1	52.9	5.7	14.3	10.4	47	21	63	77
Kurtz19-H1B10	7.6	199	15.5	196	0.4	53.4	5.5	13.6	10.4	47	25	503	81
Kurtz19-H1B11	6.7	148	13.4	188	0.4	50.6	4.7	11.4	9.8	48	21	127	80
Kurtz19-H1B12	8.5	190	15.8	182	0.8	53.6	5.7	11.7	9.9	53	23	97	82
Kurtz19-H1B13	7.5	182	14.2	186	0.4	51.9	4.9	11.3	9.7	48	32	775	78
Kurtz19-H1B14	7.3	179	14.2	185	0.6	51.1	4.6	10.6	9.5	45	23	588	75
Kurtz19-H1B15	7.5	183	14.1	188	0.6	52	5.1	11.4	9.4	46	21	360	73
Kurtz19-H1B16	7.7	189	14.6	181	0.8	53.5	5	11.2	9.6	48	24	529	78
Kurtz19-H1B17	7.4	178	14	186	0.7	52.1	5.3	10.6	9.3	47	22	593	76
Kurtz19-H1B18	7.6	196	14.9	182	0.7	53.1	4.9	12	9.8	49	20	96	74
Kurtz19-H1B19	7.9	202	15.2	183	1	54.3	5.1	11.5	9.7	49	21	220	73
Kurtz19-H1B20	7.3	186	15.3	184	0.6	51.9	4.6	11	9.7	47	22	291	73
Kurtz19-H1B21	7	180	13.7	185	0.7	51.8	4.8	10.8	9.4	48	24	596	75
Kurtz19-H1B22	7	178	13.8	187	0.5	52	5	12	9	48	22	103	77
Sheppard-H1B1	15.6	468	23.5	89	3	65	10	20	9	41	15	50	70
Sheppard-H1B2	15.9	465	23.3	87	2.5	68.4	9.3	20.1	9.8	37	17	161	80
Sheppard-H1B3	16.5	418	21.3	84	2.6	70.9	10.5	25.6	11.4	42	21	387	99
Sheppard-H1B4	16.4	340	18	79	2.7	77	11	22.3	15.1	55	23	97	118
Sheppard-H1B5	15.9	261	15.6	84	2.3	75.3	11.1	21.6	18.2	69	30	102	155
Sheppard-H1B6	15.5	261	16	92	2.1	69.2	10.1	20	17.5	75	35	126	165
Sheppard-H1B7	16.2	286	18.4	109	1.6	61.1	9.5	19.7	15	69	34	236	152
Sheppard-H1B8	15.5	270	32	112	1.7	60.1	9.3	21	14.9	76	51	106	151
Sheppard-H1B9	15.5	274	48.6	123	1.4	61.4	9	18.4	14.3	81	80	243	155
Sheppard-H1B10	16	271	49.5	119	1.4	63.3	10	17.1	14.6	79	60	158	147
Sheppard-H1B11	15.4	289	28.8	140	1.7	64	7.8	15.4	12.4	73	44	658	117
Sheppard-H1B12	14.8	272	35.4	132	1.3	61.9	8.4	16.2	12.6	70	37	239	121
Sheppard-H1B13	15	270	25.2	143	1.4	60.3	8.2	14.7	11.5	59	26	297	110
Sheppard-H1B14	15.35	286.5	27.05	138	1.5	62	8.5	21	12.5	64	32	160	117
Snyder-H1B1	10.4	277	18.5	147	1	71	6	20	9	52	17	46	63
Snyder-H1B13	8.5	201	16.55	174.5	1	55	5.5	14.5	10	48	20.5	104.5	74
SpringCreek-H1B1	15.25	420	24.65	140	2	82.5	10.5	32	12	60	21	170.5	89
SpringCreek-H2B10	12.5	231	22	226	3	67	8	26	13	73	29	94	128
Steinauer19-H1B1	12.9	304	26	144	2	82	9	21	13	90	35	121	11
Steinauer19-H1B2	13.7	300	27.8	137	2.1	88.2	9.9	19.5	14.6	91	41	106	122
Steinauer19-H1B20	8.2	152	18.2	320	3.9	56.6	5.8	11.3	9.9	111	57	285	168
Steinauer19-H1B21	8.2	145	17.8	310	4	57	5	12	10	101	38	65	160
Stinson19-H3B1	9.9	208	17.7	160	1	63	6	19	11	70	25	124	101
Stinson19-H4B1	10.2	210	18.6	166	0.8	63.4	6.4	18	11.3	67	26	96	103
Stinson19-H3B21	5.3	111	10.8	200	0.5	47.9	4	10.9	8.8	54	20	80	89
Stinson19-H3B22	4.9	105	10.3	218	0	45	3	11	9	49	17	43	68
Willis19-H1B1	9	208	16.8	161	1	54	6	16	10	58	23	114	82
Willis19-H1B22	6.8	160	13	194	0.5	50	4	11	9	45	15	71	67
Willis19-H1B1a	8.5	204	16.3	169	1	54	5	15	10	55	23	181	79
Willis19-H1B2a	9.5	219	18.3	163	1	51	6	12	10	55	23	44	80
Willis19-H1B3a	9.7	209	18.3	161	1	51	6	12	10	59	23	46	86
Willis19-H1B4a	9.7	217	18.2	166	1	53	6	12	10	60	23	46	86
Willis19-H1B10a	9.5	220	18.1	175	1	57	6	12	10	62	22	45	85
Willis19-H1B16a	7.8	161	15.1	182	1	57	6	11	10	57	21	65	85
Willis19-H1B22a	7	169	13.3	194	0.5	51	4	11	9	45	16	95	63
Standards
G-2	12.1	328	8.3	487	0	170.2	25.3	31.9	21.8	9	4	15	33
QLO-1	10.7	204	23.2	343	0.4	73.6	3.7	19.4	17	66	2	0	45
QLO-1	10.9	205	23.2	344	0.4	73.8	3.6	20	17.1	66	2	0	45
QLO-1	10.9	204	23.2	343	0.3	73.4	3.5	19.8	17.2	66	2	0	44
RGM-1	9.5	253	22.4	107	5.3	154.5	14.2	24.9	15.7	35	4	0	12
RGM-1	9.7	253	22.6	107	5.3	154.4	14.3	24.7	15.5	35	4	0	11
RGM-1	9.5	253	22.4	107	5.3	154.2	14.7	25.6	15.7	35	3	0	12
SRM-278	18	330	40.1	64	4.1	130.9	11.8	16.8	17.5	53	6	3	5
SRM-278	17.9	330	40	65	4.4	131.2	12	16.7	17.9	53	6	3	5
SRM-278	18	330	40.2	65	4.1	131.2	11.6	17	17.6	53	6	3	5
Note: Reported concentrations have not been adjusted for LOI.

## Sheet: DR8
TABLE S8. SITE CURVATURE
Site name	Depth profile	Curvature value (1/m)
Bernau	H1	-0.001527
Blue Gentian	H1	-0.006606
Harker	H1	-0.008284
Hayden	H1	-0.001603
Hoffman	H2	-0.009698
Judson	H2	-0.015276
Kalsow	H1	-0.004666
Kurtz	H1	-0.0013017
Sheppard	H1	-0.001113
Snyder	H1	-0.002471
Spring Creek	H2	-0.000836
Steinauer	H1	-0.001736
Stinson	H3	-0.012922
Willis	H1	-0.012861
Note: Curvature values were obtained from 4m-resolution DEMs with cell values averaged over a 3-cell radius, with sample site values extracted via bilinear interpolation.

## Sheet: DR9
TABLE S9. AGRICULTURAL EROSION RATES
Site Name	Time cultivated	Mean erosion rate	Median erosion rate	1σ uncertainty
	(years)	(mm/yr)	(mm/yr)	(mm/yr)
Bernau	N.D.	N.D.	N.D.	N.D.
Blue Gentian	144	4.8972	4.9235	1.26746
Harker	166	1.28254	1.29368	0.373481
Hayden	159	1.55876	1.42125	0.475303
Hoffman	159	2.90812	2.67365	1.44796
Judson	163	1.74841	1.53793	0.814299
Kalsow	134	0.58491	0.571453	0.292262
Kurtz	162	2.23571	2.29496	0.427556
Sheppard	160	0.6726	0.62584	0.231364
Snyder	N.D.	N.D.	N.D.	N.D.
Spring Creek	N.D.	N.D.	N.D.	N.D.
Steinauer	117	2.23944	2.2581	0.37637
Stinson	159	2.16278	2.21018	0.780792
Willis	164	4.70256	4.16741	2.18263
Note: All data from Thaler et al. (2022). Erosion rates are calculated from the topographic offset between cultivated fields and uncultivated prairies, averaged over the time of cultivation. N.D. = no data (agricultural erosion rates not measured).
